# Supplementary material for: Estimating contributions from biomass burning, fossil fuel combustion, and biogenic carbon to carbonaceous aerosols in the Valley of Chamonix: a dual approach based on radiocarbon and levoglucosan
Source: Copernicus journal article supplement (doi:10.5194/acp-16-13753-2016), 2016-11-07
Supplement: Supplementary file 1 [file acp-16-13753-2016-supplement.pdf]

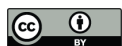

*Supplement of*

## **Estimating contributions from biomass burning, fossil fuel combustion, and biogenic carbon to carbonaceous aerosols in the Valley of Chamonix: a dual approach based on radiocarbon and levoglucosan**

**Lise Bonvalot et al.**

*Correspondence to:* Lise Bonvalot (bonvalot@cerege.fr) and Edouard Bard (bard@cerege.fr)

The copyright of individual parts of the supplement might differ from the CC-BY 3.0 licence.

## DETAILED DATA

### Contamination determination

| BLANK          |                                        |                                  |             |                                   |        |              |
|----------------|----------------------------------------|----------------------------------|-------------|-----------------------------------|--------|--------------|
| Sample index   | Measured Carbon mass [ $\mu\text{g}$ ] | Measured $\text{F}^{14}\text{C}$ | Error 2 sig | Corrected $\text{F}^{14}\text{C}$ | CI 95% | Data used in |
| AIX-19001.2.9  | 3                                      | 0.3372                           | 0.0370      | -0.0303                           | 0.1811 | Figure 1     |
| AIX-19001.2.1  | 5                                      | 0.1914                           | 0.0149      | -0.0286                           | 0.0755 |              |
| AIX-19001.2.8  | 5                                      | 0.2792                           | 0.0215      | 0.0951                            | 0.0722 |              |
| AIX-19001.2.10 | 5                                      | 0.1384                           | 0.0156      | -0.1032                           | 0.0801 |              |
| AIX-19001.2.11 | 8                                      | 0.1378                           | 0.0108      | 0.0067                            | 0.0404 |              |
| AIX-19001.2.13 | 9                                      | 0.1170                           | 0.0060      | -0.0008                           | 0.0341 |              |
| AIX-19001.2.2  | 10                                     | 0.0906                           | 0.0073      | -0.0178                           | 0.0310 |              |
| AIX-19001.2.14 | 13                                     | 0.0897                           | 0.0063      | 0.0094                            | 0.0228 |              |
| AIX-19001.2.3  | 16                                     | 0.0536                           | 0.0057      | -0.0138                           | 0.0186 |              |
| AIX-19001.2.4  | 20                                     | 0.0713                           | 0.0057      | 0.0198                            | 0.0147 |              |
| AIX-19001.2.15 | 22                                     | 0.0436                           | 0.0038      | -0.0048                           | 0.0130 |              |
| AIX-19001.2.5  | 34                                     | 0.0353                           | 0.0049      | 0.0044                            | 0.0093 |              |
| AIX-19001.2.16 | 34                                     | 0.0323                           | 0.0036      | 0.0012                            | 0.0086 |              |
| AIX-19001.2.6  | 72                                     | 0.0166                           | 0.0047      | 0.0019                            | 0.0060 |              |

| STANDARD       |                                        |                                  |             |                                   |        |              |
|----------------|----------------------------------------|----------------------------------|-------------|-----------------------------------|--------|--------------|
| Sample index   | Measured Carbon mass [ $\mu\text{g}$ ] | Measured $\text{F}^{14}\text{C}$ | Error 2 sig | Corrected $\text{F}^{14}\text{C}$ | CI 95% | Data used in |
| AIX-19002.3.15 | 3                                      | 1.1255                           | 0.0643      | 1.4955                            | 0.2083 | Figure 1     |
| AIX-19002.3.23 | 5                                      | 1.1393                           | 0.0547      | 1.3064                            | 0.0992 |              |
| AIX-19002.3.16 | 6                                      | 1.1992                           | 0.0347      | 1.3488                            | 0.0681 |              |
| AIX-19002.3.25 | 8                                      | 1.2361                           | 0.0367      | 1.3482                            | 0.0569 |              |
| AIX-19002.3.17 | 9                                      | 1.2416                           | 0.0315      | 1.3399                            | 0.0482 |              |
| AIX-19002.3.18 | 10                                     | 1.2884                           | 0.0294      | 1.3831                            | 0.0441 |              |
| AIX-19002.3.26 | 25                                     | 1.2869                           | 0.0152      | 1.3212                            | 0.0187 |              |
| AIX-19002.3.29 | 39                                     | 1.3262                           | 0.0176      | 1.3493                            | 0.0193 |              |
| AIX-19002.3.19 | 41                                     | 1.3118                           | 0.0140      | 1.3332                            | 0.0156 |              |
| AIX-19002.3.19 | 47                                     | 1.2940                           | 0.0154      | 1.3120                            | 0.0167 |              |
| AIX-19002.3.21 | 53                                     | 1.3141                           | 0.0159      | 1.3306                            | 0.0169 |              |
| AIX-19002.3.30 | 63                                     | 1.2949                           | 0.0162      | 1.3082                            | 0.0169 |              |
| AIX-19002.3.7  | 84                                     | 1.3185                           | 0.0157      | 1.3288                            | 0.0162 |              |
| AIX-19002.3.28 | 105                                    | 1.3277                           | 0.0166      | 1.3360                            | 0.0169 |              |

## Test samples: solid measurements

| Sample                    | Sample index  | Measured F <sup>14</sup> C<br>after graphitization | error 2 sigma | Data used in                    |
|---------------------------|---------------|----------------------------------------------------|---------------|---------------------------------|
| X modern carbon = 0       | AIX-20000.1.1 | 0.0016                                             | 0.0003        | <b>Figure 2 and<br/>Table 1</b> |
| X modern carbon = 0       | AIX-20000.1.2 | 0.0013                                             | 0.0003        |                                 |
| X modern carbon = 0       | AIX-20000.1.3 | 0.0010                                             | 0.0003        |                                 |
| X modern carbon = 0       | AIX-20000.1.4 | 0.0013                                             | 0.0003        |                                 |
| X modern carbon = 0       | AIX-20000.1.5 | 0.0015                                             | 0.0004        |                                 |
| X modern carbon = 0.2     | AIX-20009.1.1 | 0.2296                                             | 0.0019        | <b>Figure 2 and<br/>Table 1</b> |
| X modern carbon = 0.2     | AIX-20009.1.2 | 0.2298                                             | 0.0019        |                                 |
| X modern carbon = 0.2     | AIX-20009.1.3 | 0.2295                                             | 0.0019        |                                 |
| X modern carbon =<br>0.51 | AIX-20002.1.1 | 0.5894                                             | 0.0041        | <b>Figure 2 and<br/>Table 1</b> |
| X modern carbon =<br>0.51 | AIX-20002.1.2 | 0.5889                                             | 0.0042        |                                 |
| X modern carbon =<br>0.51 | AIX-20002.1.3 | 0.5898                                             | 0.0042        |                                 |
| X modern carbon =<br>0.51 | AIX-20002.1.4 | 0.5903                                             | 0.0043        |                                 |
| X modern carbon =<br>0.51 | AIX-20002.1.5 | 0.5895                                             | 0.0037        |                                 |
| X modern carbon = 0.8     | AIX-20003.3.1 | 0.9407                                             | 0.0055        | <b>Figure 2 and<br/>Table 1</b> |
| X modern carbon = 0.8     | AIX-20003.3.2 | 0.9424                                             | 0.0056        |                                 |
| X modern carbon = 0.8     | AIX-20003.3.3 | 0.9401                                             | 0.0056        |                                 |
| X modern carbon = 1       | AIX-20001.1.1 | 1.1865                                             | 0.0077        | <b>Figure 2 and<br/>Table 1</b> |
| X modern carbon = 1       | AIX-20001.1.2 | 1.1841                                             | 0.0077        |                                 |
| X modern carbon = 1       | AIX-20001.1.3 | 1.1854                                             | 0.0076        |                                 |
| X modern carbon = 1       | AIX-20001.1.4 | 1.1855                                             | 0.0077        |                                 |
| X modern carbon = 1       | AIX-20001.1.6 | 1.1886                                             | 0.0068        |                                 |
| Urban Dust SRM<br>1649b   | AIX-20005.1.1 | 0.5288                                             | 0.0023        | <b>Table 2</b>                  |
| Urban Dust SRM<br>1649b   | AIX-20005.1.2 | 0.5314                                             | 0.0023        |                                 |
| Urban Dust SRM<br>1649b   | AIX-20005.1.3 | 0.5340                                             | 0.0023        |                                 |
| Urban Dust SRM<br>1649b   | AIX-20005.1.4 | 0.5370                                             | 0.0035        |                                 |

## Test samples: gaseous measurements

| Sample                 | Sample Index   | Carbon mass [μg] | Error (4%) [μg] | Corrected F <sup>14</sup> C | error (CI 95%) | Data used in    |
|------------------------|----------------|------------------|-----------------|-----------------------------|----------------|-----------------|
| X modern carbon = 0    | AIX-20000.3.1  | 6                | 0.24            | 0.0694                      | 0.0575         | <b>Figure 2</b> |
| X modern carbon = 0    | AIX-20000.3.2  | 6                | 0.26            | 0.0145                      | 0.0542         |                 |
| X modern carbon = 0    | AIX-20000.3.2  | 12               | 0.50            | 0.1118                      | 0.0234         |                 |
| X modern carbon = 0    | AIX-20000.4.1  | 10               | 0.40            | 0.0364                      | 0.0310         |                 |
| X modern carbon = 0    | AIX-20000.4.2  | 11               | 0.45            | 0.0520                      | 0.0270         |                 |
| X modern carbon = 0.2  | AIX-20009.3.1  | 39               | 1.56            | 0.2277                      | 0.0215         | <b>Figure 2</b> |
| X modern carbon = 0.2  | AIX-20009.3.2  | 40               | 1.60            | 0.2059                      | 0.0170         |                 |
| X modern carbon = 0.2  | AIX-20009.3.3  | 88               | 3.52            | 0.2265                      | 0.0180         |                 |
| X modern carbon = 0.2  | AIX-20009.3.4  | 86               | 3.44            | 0.2230                      | 0.0178         |                 |
| X modern carbon = 0.2  | AIX-20009.3.5  | 156              | 6.24            | 0.2146                      | 0.0291         |                 |
| X modern carbon = 0.2  | AIX-20009.3.6  | 133              | 5.32            | 0.2139                      | 0.0367         |                 |
| X modern carbon = 0.2  | AIX-20009.3.7  | 9                | 0.36            | 0.2139                      | 0.0128         |                 |
| X modern carbon = 0.2  | AIX-20009.3.8  | 7                | 0.28            | 0.1866                      | 0.0142         |                 |
| X modern carbon = 0.2  | AIX-20009.3.9  | 25               | 1.00            | 0.2346                      | 0.0145         |                 |
| X modern carbon = 0.2  | AIX-20009.3.10 | 22               | 0.88            | 0.3381                      | 0.0108         |                 |
| X modern carbon = 0.51 | AIX-20002.3.1  | 26               | 1.06            | 0.5873                      | 0.0109         | <b>Figure 2</b> |
| X modern carbon = 0.51 | AIX-20002.3.2  | 23               | 0.91            | 0.5565                      | 0.0290         |                 |
| X modern carbon = 0.51 | AIX-20002.3.3  | 22               | 0.90            | 0.5863                      | 0.0382         |                 |
| X modern carbon = 0.51 | AIX-20002.3.4  | 44               | 1.78            | 0.5743                      | 0.0157         |                 |
| X modern carbon = 0.51 | AIX-20002.3.4  | 47               | 1.87            | 0.5834                      | 0.0137         |                 |
| X modern carbon = 0.8  | AIX-20003.1.1  | 11               | 0.46            | 0.8784                      | 0.0151         | <b>Figure 2</b> |
| X modern carbon = 0.8  | AIX-20003.1.1  | 10               | 0.40            | 0.8716                      | 0.0090         |                 |
| X modern carbon = 0.8  | AIX-20003.1.3  | 48               | 1.93            | 0.9040                      | 0.0090         |                 |
| X modern carbon = 0.8  | AIX-20003.1.4  | 48               | 1.93            | 0.9020                      | 0.0081         |                 |
| X modern carbon = 0.8  | AIX-20003.1.5  | 46               | 1.82            | 0.8926                      | 0.0080         |                 |
| X modern carbon = 1    | AIX-20001.5.7  | 19               | 0.77            | 1.1861                      | 0.0063         | <b>Figure 2</b> |
| X modern carbon = 1    | AIX-20001.5.8  | 43               | 1.73            | 1.1772                      | 0.0066         |                 |
| X modern carbon = 1    | AIX-20001.5.9  | 43               | 1.72            | 1.1790                      | 0.0322         |                 |
| X modern carbon = 1    | AIX-20001.5.10 | 41               | 1.64            | 1.1620                      | 0.0437         |                 |
| X modern carbon = 1    | AIX-20001.5.11 | 13               | 0.52            | 1.1671                      | 0.0115         |                 |
| X modern carbon = 1    | AIX-20001.5.12 | 10               | 0.40            | 1.1799                      | 0.0129         |                 |
| Urban Dust SRM 1649b   | AIX-20005.4.1  | 87               | 3.48            | 0.5057                      | 0.0133         | <b>Table 2</b>  |
| Urban Dust SRM 1649b   | AIX-20005.4.2  | 93               | 3.72            | 0.5237                      | 0.0127         |                 |
| Urban Dust SRM 1649b   | AIX-20005.4.5  | 7                | 0.28            | 0.4424                      | 0.0393         |                 |
| Urban Dust SRM 1649b   | AIX-20005.4.6  | 19               | 0.76            | 0.4753                      | 0.0153         |                 |
| Urban Dust SRM 1649b   | AIX-20005.4.7  | 11               | 0.44            | 0.4901                      | 0.0246         |                 |
| Urban Dust SRM 1649b   | AIX-20005.4.8  | 32               | 1.28            | 0.5028                      | 0.0120         |                 |
| Urban Dust SRM 1649b   | AIX-20005.4.9  | 37               | 1.48            | 0.5151                      | 0.0120         |                 |
| Urban Dust RM 8785     | AIX-20005.3.1  | 20               | 0.80            | 0.3893                      | 0.0146         | <b>Figure 3</b> |
| Urban Dust RM 8785     | AIX-20005.3.2  | 23               | 0.92            | 0.3783                      | 0.0127         |                 |
| Urban Dust RM 8785     | AIX-20005.3.3  | 23               | 0.92            | 0.3783                      | 0.0133         |                 |

**Blank measurements: Arve River valley samples**

| <b>Location</b> | <b>Date<br/>dd/mm/yy</b> | <b>Sample Index</b> | <b>Carbon mass<br/>[µg]</b> |
|-----------------|--------------------------|---------------------|-----------------------------|
| Passy           | 10/02/2014               | AIX-20007.1.57      | 4                           |
| Passy           | 10/02/2014               | AIX-20007.1.58      | 4                           |
| Passy           | 17/02/2014               | AIX-20007.1.88      | 0                           |
| Passy           | 17/02/2014               | AIX-20007.1.89      | 1                           |
| Passy           | 21/02/2014               | AIX-20007.1.29      | 1                           |
| Passy           | 21/02/2014               | AIX-20007.1.30      | 2                           |
| Passy           | 21/07/2014               | AIX-20007.1.61      | 1                           |
| Passy           | 21/07/2014               | AIX-20007.1.62      | 1                           |
| Passy           | 04/08/2014               | AIX-20007.1.74      | 2                           |
| Passy           | 04/08/2014               | AIX-20007.1.75      | 1                           |
| Passy           | 11/08/2014               | AIX-20007.1.13      | 2                           |
| Passy           | 11/08/2014               | AIX-20007.1.14      | 2                           |
| Chamonix        | 23/12/2013               | AIX-20008.1.13      | 0                           |
| Chamonix        | 23/12/2013               | AIX-20008.1.14      | 3                           |
| Chamonix        | 06/01/2014               | AIX-20008.1.25      | 1                           |
| Chamonix        | 06/01/2014               | AIX-20008.1.26      | 3                           |

## Passy measurements

| Date<br>dd/mm/yy | Sample index   | PASSY                                    |                                                |                   |                         |
|------------------|----------------|------------------------------------------|------------------------------------------------|-------------------|-------------------------|
|                  |                | Carbon mass<br>[ $\mu\text{gC m}^{-3}$ ] | $\pm$ Carbon<br>mass [ $\mu\text{gC m}^{-3}$ ] | F <sup>14</sup> C | $\pm$ F <sup>14</sup> C |
| 24/11/2013       | AIX-20007.1.1  | 16.30                                    | 0.67                                           | 0.9786            | 0.0147                  |
| 24/11/2013       | AIX-20007.1.2  | 15.63                                    | 0.64                                           | 0.9934            | 0.0147                  |
| 03/12/2013       | AIX-20007.1.3  | 48.29                                    | 1.97                                           | 1.0077            | 0.0147                  |
| 03/12/2013       | AIX-20007.1.4  | 48.29                                    | 1.97                                           | 0.9964            | 0.0149                  |
| 05/12/2013       | AIX-20007.1.33 | 24.56                                    | 1.03                                           | 0.9697            | 0.0154                  |
| 05/12/2013       | AIX-20007.1.34 | 24.56                                    | 1.03                                           | 0.9851            | 0.0153                  |
| 06/12/2013       | AIX-20007.1.5  | 37.99                                    | 1.56                                           | 1.0117            | 0.0150                  |
| 06/12/2013       | AIX-20007.1.6  | 37.40                                    | 1.54                                           | 1.0183            | 0.0147                  |
| 08/12/2013       | AIX-20007.1.35 | 37.73                                    | 1.55                                           | 1.0469            | 0.0150                  |
| 08/12/2013       | AIX-20007.1.36 | 39.51                                    | 1.62                                           | 1.0465            | 0.0159                  |
| 09/12/2013       | AIX-20007.1.21 | 47.78                                    | 1.95                                           | 0.9733            | 0.0147                  |
| 09/12/2013       | AIX-20007.1.22 | 44.22                                    | 1.81                                           | 0.9653            | 0.0143                  |
| 12/12/2013       | AIX-20007.1.7  | 54.11                                    | 2.20                                           | 0.9850            | 0.0141                  |
| 12/12/2013       | AIX-20007.1.8  | 53.51                                    | 2.18                                           | 0.9888            | 0.0143                  |
| 13/12/2013       | AIX-20007.1.9  | 59.38                                    | 2.41                                           | 0.9942            | 0.0142                  |
| 13/12/2013       | AIX-20007.1.10 | 55.20                                    | 2.25                                           | 0.9759            | 0.0142                  |
| 15/12/2013       | AIX-20007.1.11 | 34.76                                    | 1.43                                           | 1.0741            | 0.0154                  |
| 15/12/2013       | AIX-20007.1.12 | 34.17                                    | 1.41                                           | 1.0608            | 0.0149                  |
| 16/12/2013       | AIX-20007.1.15 | 41.19                                    | 1.69                                           | 0.9671            | 0.0149                  |
| 16/12/2013       | AIX-20007.1.16 | 42.97                                    | 1.76                                           | 0.9612            | 0.0142                  |
| 18/12/2013       | AIX-20007.1.17 | 27.95                                    | 1.16                                           | 0.9279            | 0.0145                  |
| 18/12/2013       | AIX-20007.1.18 | 29.71                                    | 1.23                                           | 0.9249            | 0.0141                  |
| 20/12/2013       | AIX-20007.1.19 | 24.91                                    | 1.04                                           | 0.9985            | 0.0149                  |
| 20/12/2013       | AIX-20007.1.20 | 25.50                                    | 1.06                                           | 1.0067            | 0.0150                  |
| 01/01/2014       | AIX-20007.1.23 | 7.93                                     | 0.34                                           | 0.9764            | 0.0149                  |
| 01/01/2014       | AIX-20007.1.24 | 7.71                                     | 0.33                                           | 0.9802            | 0.0148                  |
| 22/01/2014       | AIX-20007.1.41 | 18.34                                    | 0.75                                           | 0.9575            | 0.0145                  |
| 22/01/2014       | AIX-20007.1.42 | 16.54                                    | 0.68                                           | 0.9559            | 0.0155                  |
| 12/02/2014       | AIX-20007.1.25 | 7.69                                     | 0.33                                           | 0.9194            | 0.0141                  |
| 12/02/2014       | AIX-20007.1.26 | 7.92                                     | 0.33                                           | 0.9284            | 0.0144                  |
| 13/02/2014       | AIX-20007.1.43 | 6.35                                     | 0.27                                           | 0.9857            | 0.0162                  |
| 13/02/2014       | AIX-20007.1.44 | 6.57                                     | 0.28                                           | 0.9736            | 0.0163                  |
| 15/02/2014       | AIX-20007.1.37 | 3.88                                     | 0.18                                           | 0.8730            | 0.0174                  |
| 15/02/2014       | AIX-20007.1.38 | 3.66                                     | 0.17                                           | 0.8779            | 0.0185                  |
| 16/02/2014       | AIX-20007.1.39 | 16.48                                    | 0.67                                           | 1.0224            | 0.0160                  |
| 16/02/2014       | AIX-20007.1.40 | 16.48                                    | 0.67                                           | 1.0297            | 0.0143                  |
| 19/02/2014       | AIX-20007.1.45 | 17.06                                    | 0.70                                           | 0.9819            | 0.0156                  |
| 19/02/2014       | AIX-20007.1.46 | 17.06                                    | 0.70                                           | 0.9690            | 0.0159                  |
| 19/02/2014       | AIX-20007.1.47 | 17.50                                    | 0.71                                           | 0.9164            | 0.0153                  |
| 19/02/2014       | AIX-20007.1.48 | 17.28                                    | 0.71                                           | 0.9319            | 0.0157                  |
| 21/02/2014       | AIX-20007.1.27 | 12.18                                    | 0.50                                           | 1.0426            | 0.0151                  |

|            |                |       |      |        |        |
|------------|----------------|-------|------|--------|--------|
| 21/02/2014 | AIX-20007.1.28 | 11.96 | 0.49 | 1.0494 | 0.0151 |
| 22/02/2014 | AIX-20007.1.49 | 7.08  | 0.30 | 1.0131 | 0.0164 |
| 22/02/2014 | AIX-20007.1.50 | 7.08  | 0.30 | 1.0085 | 0.0161 |
| 24/02/2014 | AIX-20007.1.53 | 20.84 | 0.85 | 0.7729 | 0.0137 |
| 24/02/2014 | AIX-20007.1.54 | 15.94 | 0.65 | 0.8977 | 0.0138 |
| 24/02/2014 | AIX-20007.1.69 | 14.16 | 0.58 | 0.9649 | 0.0139 |
| 25/02/2014 | AIX-20007.1.51 | 9.93  | 0.41 | 0.9251 | 0.0156 |
| 25/02/2014 | AIX-20007.1.52 | 9.70  | 0.41 | 0.9176 | 0.0155 |
| 27/02/2014 | AIX-20007.1.55 | 12.60 | 0.52 | 0.9539 | 0.0175 |
| 27/02/2014 | AIX-20007.1.56 | 12.15 | 0.50 | 0.9578 | 0.0147 |
| 28/02/2014 | AIX-20007.1.31 | 8.81  | 0.37 | 1.0086 | 0.0153 |
| 28/02/2014 | AIX-20007.1.32 | 8.81  | 0.37 | 0.9988 | 0.0149 |
| 02/03/2014 | AIX-20007.1.59 | 7.25  | 0.31 | 1.0487 | 0.0166 |
| 02/03/2014 | AIX-20007.1.60 | 7.25  | 0.31 | 1.0197 | 0.0157 |
| 28/07/2014 | AIX-20007.1.63 | 3.56  | 0.16 | 0.7159 | 0.0170 |
| 28/07/2014 | AIX-20007.1.64 | 3.35  | 0.16 | 0.7113 | 0.0182 |
| 30/07/2014 | AIX-20007.1.65 | 2.71  | 0.13 | 0.6275 | 0.0212 |
| 30/07/2014 | AIX-20007.1.66 | 2.93  | 0.14 | 0.6221 | 0.0199 |
| 31/07/2014 | AIX-20007.1.67 | 3.33  | 0.16 | 0.7099 | 0.0180 |
| 31/07/2014 | AIX-20007.1.68 | 3.33  | 0.16 | 0.6621 | 0.0177 |
| 02/08/2014 | AIX-20007.1.70 | 3.13  | 0.15 | 0.8198 | 0.0191 |
| 02/08/2014 | AIX-20007.1.71 | 3.13  | 0.15 | 0.8097 | 0.0205 |
| 03/08/2014 | AIX-20007.1.72 | 2.92  | 0.14 | 0.8798 | 0.0228 |
| 03/08/2014 | AIX-20007.1.73 | 2.71  | 0.13 | 0.8790 | 0.0227 |
| 05/08/2014 | AIX-20007.1.76 | 3.77  | 0.17 | 0.8073 | 0.0172 |
| 05/08/2014 | AIX-20007.1.77 | 3.56  | 0.16 | 0.8241 | 0.0186 |
| 06/08/2014 | AIX-20007.1.78 | 4.64  | 0.21 | 0.7728 | 0.0151 |
| 06/08/2014 | AIX-20007.1.79 | 4.85  | 0.21 | 0.7684 | 0.0149 |
| 08/08/2014 | AIX-20007.1.82 | 3.55  | 0.16 | 0.7251 | 0.0173 |
| 08/08/2014 | AIX-20007.1.96 | 2.90  | 0.14 | 0.7051 | 0.0202 |
| 09/08/2014 | AIX-20007.1.80 | 3.12  | 0.15 | 0.8406 | 0.0200 |
| 09/08/2014 | AIX-20007.1.81 | 3.12  | 0.15 | 0.8048 | 0.0199 |
| 11/08/2014 | AIX-20007.1.84 | 2.50  | 0.13 | 0.7763 | 0.0254 |
| 11/08/2014 | AIX-20007.1.85 | 2.50  | 0.13 | 0.7657 | 0.0230 |
| 12/08/2014 | AIX-20007.1.86 | 2.73  | 0.13 | 0.8519 | 0.0243 |
| 12/08/2014 | AIX-20007.1.87 | 2.73  | 0.13 | 0.8099 | 0.0221 |
| 14/08/2014 | AIX-20007.1.90 | 1.87  | 0.10 | 0.8019 | 0.0314 |
| 14/08/2014 | AIX-20007.1.91 | 2.09  | 0.11 | 0.7877 | 0.0272 |
| 15/08/2014 | AIX-20007.1.92 | 2.33  | 0.12 | 0.8813 | 0.0280 |
| 15/08/2014 | AIX-20007.1.93 | 2.33  | 0.12 | 0.8984 | 0.0285 |
| 17/08/2014 | AIX-20007.1.94 | 2.51  | 0.13 | 0.8256 | 0.0246 |
| 17/08/2014 | AIX-20007.1.95 | 2.29  | 0.12 | 0.8215 | 0.0265 |

## Chamonix measurements

| CHAMONIX         |                |                                          |                                                |                   |                         |
|------------------|----------------|------------------------------------------|------------------------------------------------|-------------------|-------------------------|
| Date<br>dd/mm/yy | Sample Index   | Carbon mass<br>[ $\mu\text{gC m}^{-3}$ ] | $\pm$ Carbon mass<br>[ $\mu\text{gC m}^{-3}$ ] | F <sup>14</sup> C | $\pm$ F <sup>14</sup> C |
| 05/12/2013       | AIX-20008.1.1  | 19.87                                    | 0.81                                           | 0.8998            | 0.0150                  |
| 05/12/2013       | AIX-20008.1.2  | 19.65                                    | 0.80                                           | 0.8999            | 0.0163                  |
| 08/12/2013       | AIX-20008.1.3  | 24.25                                    | 1.01                                           | 0.9998            | 0.0165                  |
| 08/12/2013       | AIX-20008.1.4  | 25.39                                    | 1.06                                           | 1.0356            | 0.0168                  |
| 11/12/2013       | AIX-20008.1.5  | 28.97                                    | 1.20                                           | 0.8695            | 0.0143                  |
| 11/12/2013       | AIX-20008.1.6  | 30.12                                    | 1.25                                           | 0.8749            | 0.0154                  |
| 14/12/2013       | AIX-20008.1.7  | 21.43                                    | 0.87                                           | 0.9727            | 0.0159                  |
| 14/12/2013       | AIX-20008.1.8  | 20.55                                    | 0.84                                           | 0.9638            | 0.0160                  |
| 17/12/2013       | AIX-20008.1.9  | 29.42                                    | 1.22                                           | 0.8708            | 0.0151                  |
| 17/12/2013       | AIX-20008.1.10 | 30.56                                    | 1.26                                           | 0.8595            | 0.0152                  |
| 20/12/2013       | AIX-20008.1.11 | 7.08                                     | 0.30                                           | 0.8438            | 0.0154                  |
| 20/12/2013       | AIX-20008.1.12 | 7.08                                     | 0.30                                           | 0.8365            | 0.0171                  |
| 23/12/2013       | AIX-20008.1.15 | 19.56                                    | 0.83                                           | 0.9036            | 0.0166                  |
| 23/12/2013       | AIX-20008.1.16 | 20.69                                    | 0.87                                           | 0.9238            | 0.0156                  |
| 26/12/2013       | AIX-20008.1.17 | 5.73                                     | 0.25                                           | 0.9218            | 0.0164                  |
| 26/12/2013       | AIX-20008.1.18 | 5.73                                     | 0.25                                           | 0.9141            | 0.0162                  |
| 29/12/2013       | AIX-20008.1.19 | 8.36                                     | 0.35                                           | 0.9424            | 0.0217                  |
| 29/12/2013       | AIX-20008.1.20 | 8.36                                     | 0.35                                           | 0.9431            | 0.0159                  |
| 01/01/2014       | AIX-20008.1.21 | 26.88                                    | 1.12                                           | 1.0249            | 0.0170                  |
| 01/01/2014       | AIX-20008.1.22 | 25.75                                    | 1.07                                           | 1.0117            | 0.0170                  |
| 04/01/2014       | AIX-20008.1.23 | 8.59                                     | 0.36                                           | 0.9396            | 0.0158                  |
| 04/01/2014       | AIX-20008.1.24 | 8.37                                     | 0.35                                           | 0.9438            | 0.0159                  |
| 07/01/2014       | AIX-20008.1.27 | 19.73                                    | 0.80                                           | 0.9007            | 0.0151                  |
| 07/01/2014       | AIX-20008.1.28 | 19.94                                    | 0.81                                           | 0.8926            | 0.0157                  |



## Temperature measurements

| <b>Date<br/>dd/mm/yy</b> | <b>T [°C]</b> | <b>± T [°C]</b> | <b>Data used<br/>in</b> |
|--------------------------|---------------|-----------------|-------------------------|
| 28/07/2014               | 19.0          | 4.4             | <b>Figure 10</b>        |
| 30/07/2014               | 17.1          | 0.9             |                         |
| 31/07/2014               | 23.6          | 1.9             |                         |
| 02/08/2014               | 21.4          | 2.2             |                         |
| 03/08/2014               | 20.6          | 2.1             |                         |
| 05/08/2014               | 24.0          | 1.9             |                         |
| 06/08/2014               | 22.5          | 1.1             |                         |
| 08/08/2014               | 25.1          | 3.3             |                         |
| 09/08/2014               | 25.8          | 3.5             |                         |
| 11/08/2014               | 17.4          | 1.5             |                         |
| 12/08/2014               | 19.5          | 2.8             |                         |
| 14/08/2014               | 17.0          | 2.2             |                         |
| 15/08/2014               | 13.5          | 1.8             |                         |
| 17/08/2014               | 22.1          | 2.5             |                         |
